# Supplementary material for: Reliable cell purification and determination of cell purity: crucial aspects of olfactory ensheathing cell transplantation for spinal cord repair
Source: PubMed Central journal article supplement — Neural Regen Res. 2020 May 11;15(11):2016–26. doi: 10.4103/1673-5374.282218 (PMC7716040; doi:10.4103/1673-5374.282218), 2020-05-11
Supplement: NRR-15-2016_Suppl2.pdf [file NRR-15-2016_Suppl2.pdf]

**Additional Table 1 Summary of source of cells, method of purification, reported purity, method of estimating/ quantification, cells in the mix, key structural and functional outcomes**

| Authors               | Title                                                                                                                                                                                | Source of cells    |      |                                                                      | Reported purity                       | Method of purity estimation/ quantification        | Cells in the mix                          | Key structural outcomes                                                               | Key functional outcomes                           |
|-----------------------|--------------------------------------------------------------------------------------------------------------------------------------------------------------------------------------|--------------------|------|----------------------------------------------------------------------|---------------------------------------|----------------------------------------------------|-------------------------------------------|---------------------------------------------------------------------------------------|---------------------------------------------------|
|                       |                                                                                                                                                                                      | Animal             | Site | Method of purification                                               |                                       |                                                    |                                           |                                                                                       |                                                   |
| Thornton et al., 2018 | Evidence of axon connectivity across a spinal cord transection in rats treated with epidural stimulation and motor training combined with olfactory ensheathing cell transplantation | SD rats            | OB   | Immunopurification, p75                                              | n/m                                   | n/m                                                | n/m                                       | + injury repair                                                                       | - motor recovery                                  |
| Zheng et al., 2017    | Olfactory ensheathing cell transplantation inhibits P2X4 receptor overexpression in spinal cord injury rats with neuropathic pain                                                    | SD rats            | OB   | n/m                                                                  | > 95%                                 | p75NTR, GFAP                                       | n/m                                       | + injury repair, + inflammation reduction                                             | + sensory recovery                                |
| Zhang et al., 2017    | The Effects of Co-transplantation of Olfactory Ensheathing Cells and Schwann Cells on Local Inflammation Environment in the Contused Spinal Cord of Rats                             | SD rats            | OB   | n/m                                                                  | > 95%                                 | anti-S100 and anti-P75                             | SCs                                       | + cell survival, + migration, + inflammation reduction                                | + motor recovery, + electrophysiological recovery |
| Tsai et al., 2017     | Improving the regenerative potential of olfactory ensheathing cells by overexpressing prostacyclin synthetase and its application in spinal cord repair                              | SD rats            | OB   | Differential adhesion                                                | > 90% (90.8±4%, 91.3±2.9%, 97.0±1.3%) | p75, S100, GFAP                                    | n/m                                       | + injury repair                                                                       | + motor recovery                                  |
| Tang et al., 2017     | Ginsenoside Rg1 Promotes the Migration of Olfactory Ensheathing Cells via the PI3K/Akt Pathway to Repair Rat Spinal Cord Injury                                                      | SD rats            | OB   | Purified using cytosine arabinoside at different adherent velocities | 97.70%                                | p75 flowcytometry                                  | n/m                                       | + injury repair, + degeneration mitigation, + inflammation reduction                  | + motor recovery                                  |
| Liu et al., 2017      | Intrathecal transplantation of olfactory ensheathing cells by lumbar puncture for thoracic spinal cord injury in mice                                                                | C57BL/6 mice       | OB   | Differential adhesion                                                | “OECs were all marked by p75”         | p75 immunostaining                                 | n/m                                       | + migration, + injury repair, + degeneration mitigation                               | + motor recovery                                  |
| Gu et al., 2017       | Conditioned medium of olfactory ensheathing cells promotes the functional recovery and axonal regeneration after contusive spinal cord injury                                        | SD rats            | OB   | Differential adhesion                                                | 93±3.54%                              | p75NTR                                             | n/m                                       | + injury repair                                                                       | + motor recovery                                  |
| Feng et al., 2017     | Effect of transplantation of olfactory ensheathing cell conditioned medium induced bone marrow stromal cells on rats with spinal cord injury                                         | SD rats            | OB   | Differential adhesion                                                | n/m                                   | n/m                                                | Fibroblasts (indirectly mentioned)        | + injury repair, + degeneration mitigation, + inflammation reduction                  | + motor recovery                                  |
| Gu et al., 2017       | Feasibility of Diffusion Tensor Imaging for Assessing Functional Recovery in Rats with Olfactory Ensheathing Cell Transplantation After Contusive Spinal Cord Injury (SCI)           | SD rats            | OB   | Differential adhesion                                                | 91±2.66%                              | p75 immunostaining                                 | n/m                                       | + degeneration mitigation                                                             | + motor recovery                                  |
| Collins et al., 2017  | Transplantation of Cultured Olfactory Bulb Cells Prevents Abnormal Sensory Responses During Recovery From Dorsal Root Avulsion in the Rat                                            | SD rats            | OB   | n/m                                                                  | ~50%                                  | n/m                                                | Olfactory nerve fibroblasts               | + migration, + injury repair, + degeneration mitigation                               | + sensory recovery                                |
| Nategh et al., 2016   | Subarachnoid Space Transplantation of Schwann and/or Olfactory Ensheathing Cells Following Severe Spinal Cord Injury Fails to Improve Locomotor Recovery in Rats                     | female Wistar rats | OB   | Differential adhesion                                                | n/m                                   | n/m                                                | Fibroblasts, with Schwann cells, not OECs | Not mentioned                                                                         | - motor recovery                                  |
| Li et al., 2016       | Functional Repair of Rat Corticospinal Tract Lesions Does Not Require Permanent Survival of an Immunoincompatible Transplant                                                         | C57BL/6 mice       | OB   | n/m                                                                  | 60–70%                                | p75 and fibronectin immunostaining                 | Fibroblasts (30–40%)                      | + injury repair, - cell survival                                                      | + motor recovery                                  |
| Khankan et al., 2016  | Olfactory Ensheathing Cell Transplantation after a Complete Spinal Cord Transection Mediates Neuroprotective and Immunomodulatory Mechanisms to Facilitate Regeneration              | SD rats            | OB   | Immunopurification, p75NGFR                                          | 89%                                   | immunostaining 89% p-75-NGFR; 96% S100; 100% Sox10 | n/m                                       | + cell survival, + injury repair, + degeneration mitigation, + inflammation reduction | Not studied                                       |
| Gomes et al., 2016    | Combination of a peptide-modified gellan gum hydrogel with cell therapy in a lumbar spinal cord injury animal model                                                                  | Wistar rats        | OB   | Differential adhesion                                                | n/m                                   | p75-NGFR                                           | n/m                                       | + injury repair, + inflammation reduction                                             | + motor recovery                                  |

**Additional Table 1 Continued**

| Authors                   | Title                                                                                                                                                                         | Source of cells           |      |                                      | Reported purity                                  | Method of purity estimation/quantification                   | Cells in the mix                     | Key structural outcomes                                                           | Key functional outcomes                                               |
|---------------------------|-------------------------------------------------------------------------------------------------------------------------------------------------------------------------------|---------------------------|------|--------------------------------------|--------------------------------------------------|--------------------------------------------------------------|--------------------------------------|-----------------------------------------------------------------------------------|-----------------------------------------------------------------------|
|                           |                                                                                                                                                                               | Animal                    | Site | Method of purification               |                                                  |                                                              |                                      |                                                                                   |                                                                       |
| Kang et al., 2015         | Effectiveness of muscle basal lamina carrying neural stem cells and olfactory ensheathing cells in spinal cord repair                                                         | SD rats                   | OB   | Differential adhesion                | 90%                                              | p75-NGFR                                                     | n/m                                  | + cell survival, + migration                                                      | + motor recovery                                                      |
| Torres-Espin et al., 2014 | Bone marrow mesenchymal stromal cells and olfactory ensheathing cells transplantation after spinal cord injury – a morphological and functional comparison in rats            | SD rats                   | OB   | MACS - p75NGFR                       | 75%                                              | p75, S100                                                    | n/m                                  | + cell survival, + degeneration mitigation, + inflammation reduction              | x motor recovery, x sensory recovery, x electrophysiological recovery |
| Torres-Espin et al., 2013 | Gene expression changes in the injured spinal cord following transplantation of mesenchymal stem cells or olfactory ensheathing cells                                         | SD rats                   | OB   | MACS - p75NGFR                       | 75%                                              | p75, S100                                                    | n/m                                  | N/A                                                                               | N/A                                                                   |
| Sun et al., 2013          | Cotransplantation of olfactory ensheathing cells and schwann cells combined with treadmill training promotes functional recovery in rats with contused spinal cords           | SD rats                   | OB   | n/m                                  | “most of the cultured cells”                     | p75 immunostaining                                           | n/m                                  | + cell survival, + migration, + injury repair, + inflammation reduction           | + motor recovery                                                      |
| Mayeur et al., 2013       | Potential of Olfactory Ensheathing Cells from Different Sources for Spinal Cord Repair                                                                                        | Fischer rats              | OB   | Differential adhesion                | 70% unpurified, 97% purified                     | Flowcytometry p75                                            | n/m                                  | + injury repair, + degeneration mitigation, + inflammation reduction              | + motor recovery, + electrophysiological recovery                     |
| Lang et al., 2013         | OECs transplantation results in neuropathic pain associated with BDNF regulating ERK activity in rats following cord hemisection                                              | GFP transgenic mice       | OB   | Differential adhesion                | > 95%                                            | Immunochemical staining p75                                  | n/m                                  | Not studied                                                                       | - sensory recovery                                                    |
| Deumens et al., 2013      | Motor outcome and allodynia are largely unaffected by novel olfactory ensheathing cell grafts to repair low-thoracic lesion gaps in the adult rat spinal cord                 | GFP transgenic Lewis rats | OB   | MACS - p75NGFR                       | n/m                                              | n/m                                                          | n/m                                  | Not studied                                                                       | x motor recovery, x sensory recovery                                  |
| Coutts et al., 2013       | Embryonic-derived olfactory ensheathing cells remyelinate focal areas of spinal cord demyelination more efficiently than neonatal or adult-derived cells                      | Fischer rats              | OB   | Immunopanning with p75 NTR           | 97-99% (embryonic, neonatal, adult origin cells) | p75 NTR, Thy-1.1, S100 $\beta$ , GFAP, Fibronectin, Calponin | meningeal, FB-like cells, Astrocytes | + cell survival, + injury repair                                                  | Not studied                                                           |
| Barbour et al., 2013      | Tissue sparing, behavioral recovery, supraspinal axonal sparing/regeneration following sub-acute glial transplantation in a model of spinal cord contusion                    | Fischer rats              | OB   | Immunoaffinity to p75 receptor       | n/m                                              | n/m                                                          | n/m                                  | + migration, + injury repair, + degeneration mitigation, + inflammation reduction | + motor recovery                                                      |
| Yazdani et al., 2012      | A comparison between neurally induced bone marrow derived mesenchymal stem cells and olfactory ensheathing glial cells to repair spinal cord injuries in rat                  | Wistar rats               | OB   | Immunopanning with p75 NTR           | > 95%                                            | p75 immunostaining                                           | n/m                                  | + cell survival, -injury repair                                                   | - motor recovery                                                      |
| Roet et al., 2012         | Noninvasive Bioluminescence Imaging of olfactory ensheathing glia and schwann cells following transplantation into the lesioned rat spinal cord                               | Fischer rats              | OB   | Immunopanning with p75 NTR           | 99.70%                                           | p75 expression (also found in 100% SCs)                      | n/m                                  | + cell survival                                                                   | Not studied                                                           |
| Li et al., 2012           | Differing schwann cells and olfactory ensheathing cells behaviors, from interacting with astrocyte, produce similar improvements in contused rat spinal cord's motor function | GFP transgenic rats       | OB   | n/m                                  | 95%                                              | p75 and s100                                                 | n/m                                  | + migration, + injury repair, + inflammation reduction                            | + motor recovery, + electrophysiological recovery                     |
| Ziegler et al., 2011      | Further evidence of olfactory ensheathing glia facilitating axonal regeneration after a complete spinal cord transection                                                      | Wistar rats               | OB   | Immunopurification with p75 receptor | n/m                                              | n/m                                                          | n/m                                  | Not studied                                                                       | + motor recovery, + electrophysiological recovery                     |
| Takeoka et al., 2011      | Axon regeneration can facilitate or suppress hindlimb function after olfactory ensheathing glia transplantation                                                               | Wistar rats               | OB   | Immunopurification with p75          | 95 $\pm$ 1%                                      | p75, S100, GFAP                                              | n/m                                  | + cell survival, + injury repair, + degeneration mitigation                       | + motor recovery, + sensory recovery, + electrophysiological recovery |

**Additional Table 1 Continued**

| Authors                   | Title                                                                                                                                                                  | Source of cells           |          |                                                                           | Reported purity                      | Method of purity estimation/quantification        | Cells in the mix                                    | Key structural outcomes                                                  | Key functional outcomes                           |
|---------------------------|------------------------------------------------------------------------------------------------------------------------------------------------------------------------|---------------------------|----------|---------------------------------------------------------------------------|--------------------------------------|---------------------------------------------------|-----------------------------------------------------|--------------------------------------------------------------------------|---------------------------------------------------|
|                           |                                                                                                                                                                        | Animal                    | Site     | Method of purification                                                    |                                      |                                                   |                                                     |                                                                          |                                                   |
| Novikova et al., 2011     | Efficacy of olfactory ensheathing cells to support regeneration after spinal cord injury is influenced by method of culture preparation                                | SD rats                   | OB       | 2 methods: differential adhesion (a-OEC), and immunomagnetic bead (b-OEC) | 93–95% (a-OEC) and 80% (b-OEC)       | p75, s100 immunostaining, And GFAP immunostaining | Fibroblasts, endothelial cells (as Thy 1.1 + cells) | + injury repair, + degeneration mitigation                               | Not studied                                       |
| Li et al., 2011           | Olfactory ensheathing cell transplantation into spinal cord prolongs the survival of mutant SOD1G93A ALS rats through neuroprotection and remyelination                | GFP transgenic Lewis rats | OB       | NT3, repeated passages (5)                                                | > 95%                                | GFP (Ubiquitously expressed) and p75 co-staining  | n/m                                                 | + cell survival, + migration, + injury repair, + degeneration mitigation | Not studied                                       |
| Li et al., 2011           | Olfactory ensheathing cells can reduce the tissue loss but not the cavity formation in contused spinal cord of rats                                                    | GFP transgenic rats       | OB       | n/m                                                                       | > 95%                                | p75 and S100 immunostaining                       | n/m                                                 | + migration, + injury repair, + degeneration mitigation                  | + motor recovery, + electrophysiological recovery |
| Wang et al., 2010         | Synergistic effect of neural stem cells and olfactory ensheathing cells on repair of adult rat spinal cord injury                                                      | SD rats                   | OB       | Differential adhesion                                                     | 92.3±6.8%, (Pre purification: < 70%) | p75, S100β                                        | n/m                                                 | + injury repair                                                          | x motor recovery                                  |
| Takeoka et al., 2010      | Noradrenergic innervation of the rat spinal cord caudal to a complete spinal cord transection: effects of olfactory ensheathing glia                                   | Wistar rats               | OB       | Immunopurified with p75                                                   | n/m                                  | n/m                                               | n/m                                                 | N/A                                                                      | N/A                                               |
| Ma et al., 2010           | Effect of neurotrophin-3 genetically modified olfactory ensheathing cells transplantation on spinal cord injury                                                        | SD rats                   | OB       | Immunopanning with p75                                                    | > 95%                                | p75 immunostaining                                | n/m                                                 | + injury repair                                                          | + motor recovery                                  |
| Liu et al., 2010          | Analysis of olfactory ensheathing glia transplantation-induced repair of spinal cord injury by electrophysiological, behavioral, and histochemical methods in rats     | SD rats                   | OB       | n/m                                                                       | n/m                                  | n/m                                               | n/m                                                 | + injury repair                                                          | + motor recovery, + electrophysiological recovery |
| Li et al., 2010           | Survival and number of olfactory ensheathing cells transplanted in contused spinal cord of rats                                                                        | GFP transgenic rats       | OB       | n/m                                                                       | > 95%                                | p75 NGFR and S100 double immunostaining           | n/m                                                 | + cell survival                                                          | + motor recovery                                  |
| Takeoka et al., 2009      | Serotonergic innervation of the caudal spinal stump in rats after complete spinal transection: effect of olfactory ensheathing glia                                    | Wistar rats               | OB       | Immunopurification with p75 receptor                                      | n/m                                  | n/m                                               | n/m                                                 | N/A                                                                      | N/A                                               |
| Su et al., 2009           | Reactive astrocytes in glial scar attract olfactory ensheathing cells migration by secreted TNF-α in spinal cord lesion of rat                                         | GFP transgenic SD rats    | OB       | Differential adhesion                                                     | > 95%                                | S100 immunostaining                               | n/m                                                 | + migration                                                              | Not studied                                       |
| Salehi et al., 2009       | Repair of spinal cord injury by co-transplantation of embryonic stem cell-derived motor neuron and olfactory ensheathing cell                                          | Wistar rats               | OB       | Differential adhesion                                                     | 95%                                  | p75 immunostaining                                | n/m                                                 | + degeneration mitigation                                                | + motor recovery                                  |
| Munoz-Quiles et al., 2009 | Chronic spinal injury repair by olfactory bulb ensheathing glia and feasibility for autologous therapy                                                                 | Wistar rats               | OB       | Purified using p75 receptor expression                                    | n/m                                  | n/m                                               | n/m                                                 | + injury repair                                                          | + motor recovery                                  |
| Fouad et al., 2009        | Transplantation and repair: Combined cell implantation and chondroitinase delivery prevents deterioration of bladder function in rats with complete spinal cord injury | Fischer rats              | OB (n/m) | n/m                                                                       | n/m                                  | n/m                                               | n/m                                                 | N/A                                                                      | Autonomic functions                               |
| Negredo et al., 2008      | Slow- and fast-twitch rat hind limb skeletal muscle phenotypes 8months after spinal cord transection and olfactory ensheathing glia transplantation                    | Wistar rats               | OB       | Immunopurification with p75 receptor                                      | n/m                                  | p75                                               | n/m                                                 | Not studied                                                              | + motor recovery, + sensory recovery              |
| Lankford et al., 2008     | Olfactory ensheathing cells exhibit unique migratory, phagocytic, and myelinating properties in the x-irradiated spinal cord not shared by schwann cells               | GFP transgenic rats       | OB       | n/m                                                                       | n/m                                  | n/m                                               | n/m                                                 | + cell survival, + migration, + injury repair                            | Not studied                                       |

**Additional Table 1 Continued**

| Authors                | Title                                                                                                                                                     | Source of cells |      |  | Method of purification                                                                                     | Reported purity              | Method of purity estimation/quantification                                  | Cells in the mix                                                      | Key structural outcomes                                                                            | Key functional outcomes                           |
|------------------------|-----------------------------------------------------------------------------------------------------------------------------------------------------------|-----------------|------|--|------------------------------------------------------------------------------------------------------------|------------------------------|-----------------------------------------------------------------------------|-----------------------------------------------------------------------|----------------------------------------------------------------------------------------------------|---------------------------------------------------|
|                        |                                                                                                                                                           | Animal          | Site |  |                                                                                                            |                              |                                                                             |                                                                       |                                                                                                    |                                                   |
| Kubasak et al., 2008   | OEG implantation and step training enhance hindlimb-stepping ability in adult spinal transected rats                                                      | Wistar rats     | OB   |  | Immunopurification with p75 receptor                                                                       | n/m                          | n/m                                                                         | n/m                                                                   | + injury repair, + degeneration mitigation                                                         | + motor recovery                                  |
| Voronova et al., 2018  | Survival and migration of rat olfactory ensheathing cells after transplantation into posttraumatic cysts in the spinal cord                               | Wistar rats     | OM   |  | n/m                                                                                                        | n/m                          | P75NTR+ and GFAP+ cells were counted in 10 fields of view                   | n/m                                                                   | + cell survival, + migration                                                                       | Not studied                                       |
| Stepanova et al., 2018 | Isolation of rat olfactory ensheathing cells and their use in the therapy of posttraumatic cysts of the spinal cord                                       | Wistar rats     | OM   |  | n/m                                                                                                        | 95–97%                       | P75NTR+ and GFAP+ cells were counted in 10 fields of view                   | n/m                                                                   | + injury repair                                                                                    | + motor recovery                                  |
| Muniswami et al., 2018 | Therapeutic effect of cell transplantation and chondroitinase in rat spinal cord injury                                                                   | Wistar rats     | OM   |  | n/m                                                                                                        | n/m                          | n/m                                                                         | n/m                                                                   | + degeneration mitigation                                                                          | + motor recovery                                  |
| Muniswami et al., 2018 | Functional recovery following the transplantation of olfactory ensheathing cells in rat spinal cord injury model                                          | Wistar rats     | OM   |  | n/m                                                                                                        | n/m                          | 41% p75NTR, 35% Fibronectin, 75% S100 $\beta$ , 83% GFAP, immunostaining    | Olfactory nerve fibroblasts                                           | + cell survival                                                                                    | + motor recovery, + electrophysiological recovery |
| Cloutier et al., 2016  | Olfactory ensheathing cells but not fibroblasts reduce the duration of autonomic dysreflexia in spinal cord injured rats                                  | Wistar rats     | OM   |  | NT3                                                                                                        | n/m                          | n/m                                                                         | n/m                                                                   | + cell survival                                                                                    | Autonomic functions                               |
| Ibrahim et al., 2014   | Comparison of olfactory bulbar and mucosal cultures in a rat rhizotomy model                                                                              | AS Rats         | OM   |  | None used                                                                                                  | 5%                           | p75, S100 $\beta$ , nestin for OECs; and Thy-1, fibronectin for fibroblasts | FBS                                                                   | + cell survival, - migration, - injury repair                                                      | - motor recovery                                  |
| Toft et al., 2013      | A Comparative study of glial and non-neural cell properties for transplant-mediated repair of the injured spinal cord                                     | Fischer rats    | OM   |  | FACS (O4 +, GalC-)                                                                                         | 97%                          | p75NTR, OECs also found to express TUJ-1 (50%) and fibronectin              | n/m                                                                   | + injury repair, + degeneration mitigation, + inflammation reduction                               | Not studied                                       |
| Mayeur et al., 2013    | Potential of olfactory ensheathing cells from different sources for spinal cord repair                                                                    | Fischer rats    | OM   |  | Repeated passages                                                                                          | 15% unpurified, 98% purified | Flowcytometry p75                                                           | n/m                                                                   | + cell survival, + migration, + injury repair, + degeneration mitigation, + inflammation reduction | + motor recovery, + electrophysiological recovery |
| Centenaro et al., 2013 | Implications of olfactory lamina propria transplantation on hyperreflexia and myelinated fiber regeneration in rats with complete spinal cord transection | Wistar rats     | OM   |  | n/m                                                                                                        | n/m                          | n/m                                                                         | n/m                                                                   | x Injury repair                                                                                    | x sensory recovery                                |
| Toft et al., 2012      | Transplant-mediated repair properties of rat olfactory mucosal OM-I and OM-II sphere-forming cells                                                        | Fischer rats    | OM   |  | Purified by surface marker expression of p75 and CD90 to isolate MSCs from OECs in OM-I (EasySep Magnetic) | n/m                          | p75 for OECs (in OM-I), with SMA, CD90, nestin; and Cytokeratin for OM-II   | MSCs and OECs are mixed in OM-I type, not specified clearly otherwise | + cell survival, + injury repair, - inflammation reduction                                         | Not studied                                       |
| Zhang et al., 2011     | Scar ablation combined with LP/OEC transplantation promotes anatomical recovery and P0-positive myelination in chronically contused spinal cord of rats   | Long Evans rats | OM   |  | Not specified, only mentioned as removal of fibroblasts                                                    | n/m                          | immunostaining with p75 and GFAP                                            | SCs and FBS                                                           | + cell survival, + injury repair, + inflammation reduction                                         | x motor recovery                                  |
| Wu et al., 2011        | Delayed olfactory ensheathing cell transplants reduce nociception after dorsal root injury                                                                | Wistar rats     | OM   |  | NT3                                                                                                        | > 90%                        | p75, GFAP (and - for HNK1)                                                  | n/m                                                                   | Not studied                                                                                        | - motor recovery, - sensory recovery              |
| Tharion et al., 2011   | Motor recovery following olfactory ensheathing cell transplantation in rats with spinal cord injury                                                       | Wistar rats     | OM   |  | None used                                                                                                  | n/m                          | p75, fibronectin                                                            | FBS                                                                   | + cell survival                                                                                    | + motor recovery, + electrophysiological recovery |
| Stamenga et al., 2011  | Nasal OEC transplantation promotes respiratory recovery in a subchronic rat model of cervical spinal cord contusion                                       | SD rats         | OM   |  | NT3                                                                                                        | > 90%                        | p75, GFAP (and - for HNK1)                                                  | HNK1 - SCs                                                            | + injury repair                                                                                    | Autonomic functions                               |

**Additional Table 1 Continued**

| Authors                | Title                                                                                                                                                       | Source of cells     |      |                                       | Reported purity | Method of purity estimation/quantification | Cells in the mix            | Key structural outcomes                                             | Key functional outcomes                           |
|------------------------|-------------------------------------------------------------------------------------------------------------------------------------------------------------|---------------------|------|---------------------------------------|-----------------|--------------------------------------------|-----------------------------|---------------------------------------------------------------------|---------------------------------------------------|
|                        |                                                                                                                                                             | Animal              | Site | Method of purification                |                 |                                            |                             |                                                                     |                                                   |
| Centenaro et al., 2011 | Olfactory and respiratory lamina propria transplantation after spinal cord transection in rats: Effects on functional recovery and axonal regeneration      | Wistar rats         | OM   | n/m                                   | n/m             | p75, S100, GFAP                            | n/m                         | x Injury repair                                                     | Not studied                                       |
| Kalincik et al., 2010b | Selected changes in spinal cord morphology after T4 transection and olfactory ensheathing cell transplantation                                              | Wistar rats         | OM   | NT3                                   | > 90%           | p75 immunostaining                         | n/m                         | + injury repair, + degeneration mitigation                          | Not studied                                       |
| Kalincik et al., 2010a | Olfactory ensheathing cells reduce duration of autonomic dysreflexia in rats with high spinal cord injury                                                   | Wistar rats         | OM   | NT3                                   | > 90%           | p75 and GFAP immunostaining                | Non myelinating SCs         | + cell survival                                                     | Autonomic functions                               |
| Bretzner et al., 2010  | Combination of olfactory ensheathing cells with local versus systemic cAMP treatment after a cervical rubrospinal tract injury                              | GFP transgenic mice | OM   | Anti-Thy1.1-mediated complement lysis | > 75%           | p75 and GFAP immunostaining                | Fibroblasts (not confirmed) | + degeneration mitigation, + inflammation reduction, -injury repair | + sensory recovery                                |
| Aoki et al., 2010      | Limited functional recovery in rats with complete spinal cord injury after transplantation of whole-layer olfactory mucosa                                  | Wistar rats         | OM   | None used                             | Not applicable  | None used                                  | n/m                         | + injury repair, + degeneration mitigation                          | + motor recovery                                  |
| Amemori et al., 2010   | Co-transplantation of olfactory ensheathing glia and mesenchymal stromal cells does not have synergistic effects after spinal cord injury in the rat        | Wistar rats         | OM   | n/m                                   | > 80%           | p75, S100 Immunostaining                   | n/m                         | + degeneration mitigation                                           | + motor recovery, + electrophysiological recovery |
| Yamamoto et al., 2009  | Transplanted olfactory mucosal cells restore paw reaching function without regeneration of severed corticospinal tract fibres across the lesion             | AS Rats             | OM   | None used                             | 5%              | p75 immunostaining                         | FBs (assumed)               | - migration, - injury repair                                        | + motor recovery                                  |
| Iwatsuki et al., 2008  | Transplantation of olfactory mucosa following spinal cord injury promotes recovery in rats                                                                  | SD rats             | OM   | None used                             | Not applicable  | None used                                  | n/m                         | + cell survival, + injury repair                                    | + motor recovery                                  |
| Bretzner et al., 2008  | Undesired effects of a combinatorial treatment for spinal cord injury – transplantation of olfactory ensheathing cells and BDNF infusion to the red nucleus | GFP transgenic mice | OM   | Anti-Thy1.1-mediated complement lysis | >75%            | p75 and GFAP immunostaining                | FBs (assumed)               | + degeneration mitigation, + inflammation reduction                 | + motor recovery, + sensory recovery              |
| Luo et al., 2013       | Transplantation of NSCs with OECs alleviates neuropathic pain associated with NGF downregulation in rats following spinal cord injury                       | SD rats             | n/m  | n/m                                   | 95%             | p75 immunostaining                         | n/m                         | Not studied                                                         | - sensory recovery                                |

For outcome description: +: positive/desirable outcome; -: poor/undesirable outcome, x: outcome was not statistically significant; GFAP: glial fibrillary acidic protein; MACS: magnetic cell sorting; N/A: not applicable for the given study/irrelevant to the research question of the study; OB: olfactory bulb; OEC: olfactory ensheathing cell; n/m: not mentioned; OM: olfactory mucosa; SD: Sprague-Dawley.
